# Supplementary material
Source: PubMed Central journal article supplement (PMC9354142)
Supplement: NIHMS1823003-supplement-Supply.pdf [file NIHMS1823003-supplement-Supply.pdf]

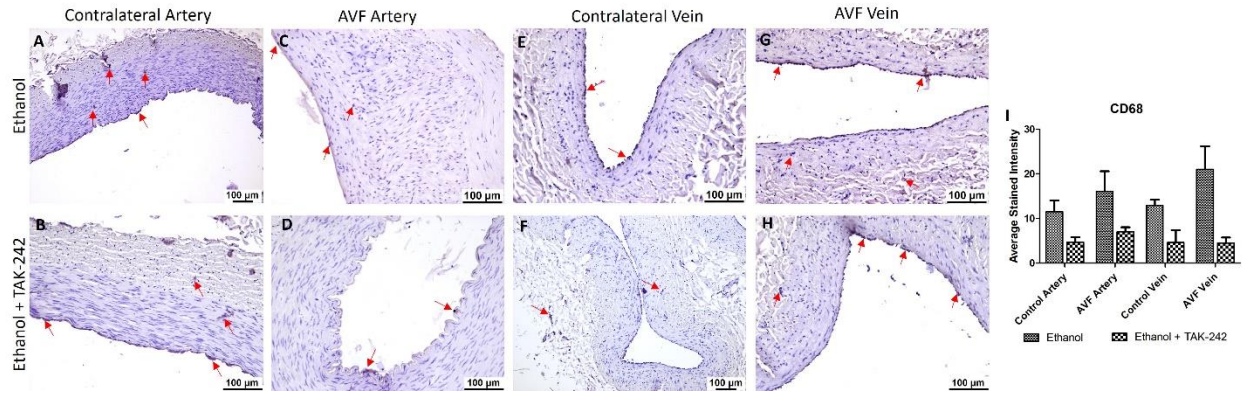

**Supplementary Figure 1:** Immunostaining for macrophages in femoral vessels involved in arteriovenous fistula (AVF) and contralateral femoral vessels in swine treated with toll-like receptor (TLR)-4 inhibitor TAK-242 and vehicle control (30% ethanol). Immunostaining for CD68 in contralateral femoral vessels (panels A, B, E, and F) and femoral vessels involved in AVF (panels C, D, G, and H), and average stained intensity (panel I). These images are represented images from all swine selected for this study. Red arrows show the positively stained immune cells. All data are presented as Mean  $\pm$  SEM. A probability ( $p$ ) value  $<0.05$  was considered as significant. \* $p<0.05$ , \*\*\* $p<0.001$ .

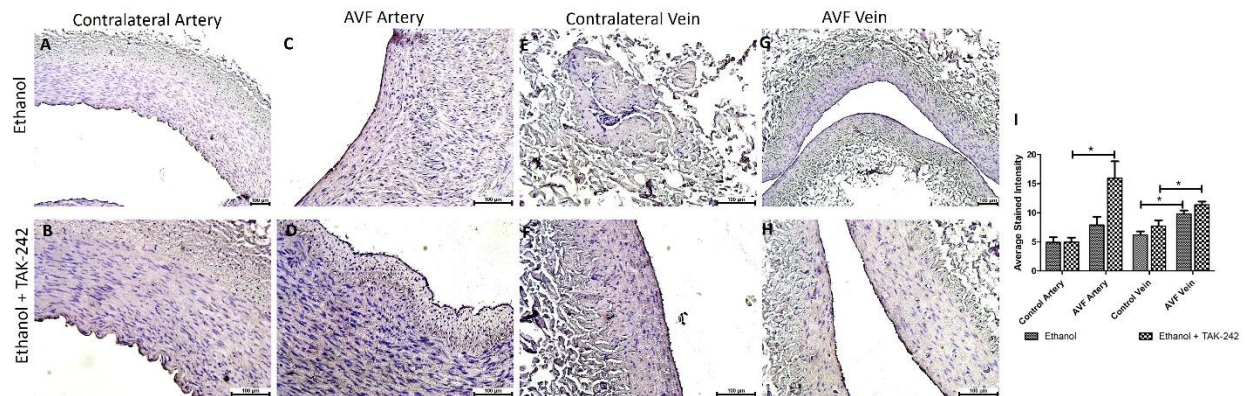

**Supplementary Figure 2:** Immunostaining for macrophages in femoral vessels involved in arteriovenous fistula (AVF) and contralateral femoral vessels in swine treated with toll-like receptor (TLR)-4 inhibitor TAK-242 and vehicle control (30% ethanol). Immunostaining for CD86 in contralateral femoral vessels (panels A, B, E, and F) and femoral vessels involved in AVF (panels C, D, G, and H), and average stained intensity (panel I). These images are represented images from all swine selected for this study. Red arrows show the positively stained immune cells. All data are presented as Mean  $\pm$  SEM. A probability ( $p$ ) value  $<0.05$  was considered as significant. \* $p<0.05$ ,

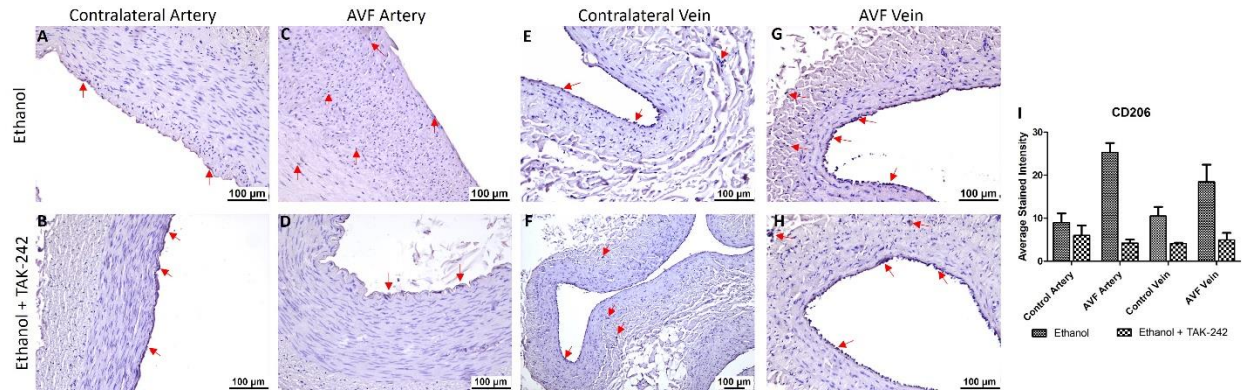

**Supplementary Figure 3:** Immunostaining for macrophages in femoral vessels involved in arteriovenous fistula (AVF) and contralateral femoral vessels in swine treated with toll-like receptor (TLR)-4 inhibitor TAK-242 and vehicle control (30% ethanol). Immunostaining for CD206 in contralateral femoral vessels (panels A, B, E, and F) and femoral vessels involved in AVF (panels C, D, G, and H), and average stained intensity (panel I). These images are represented images from all swine selected for this study. Red arrows show the positively stained immune cells. All data are presented as Mean  $\pm$  SEM. A probability ( $p$ ) value  $<0.05$  was considered as significant.

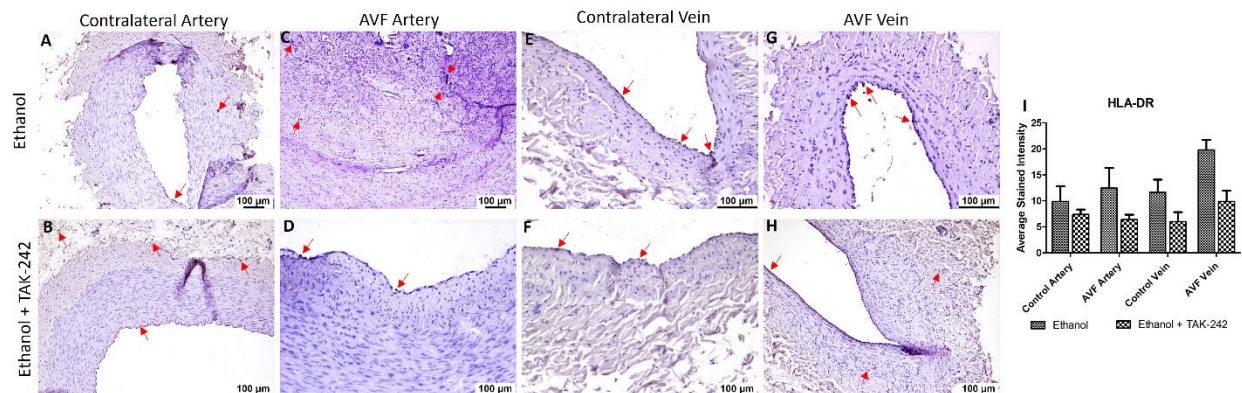

**Supplementary Figure 4:** Immunostaining for dendritic cells in femoral vessels involved in arteriovenous fistula (AVF) and contralateral femoral vessels in swine treated with toll-like receptor (TLR)-4 inhibitor TAK-242 and vehicle control (30% ethanol). Immunostaining for HLA-DR in contralateral femoral vessels (panels A, B, E, and F) and femoral vessels involved in AVF (panels C, D, G, and H), and average stained intensity (panel I). These images are represented images from all swine selected for this study. Red arrows show the positively stained immune cells. All data are presented as Mean  $\pm$  SEM. A probability ( $p$ ) value  $<0.05$  was considered as significant. \* $p < 0.05$ .

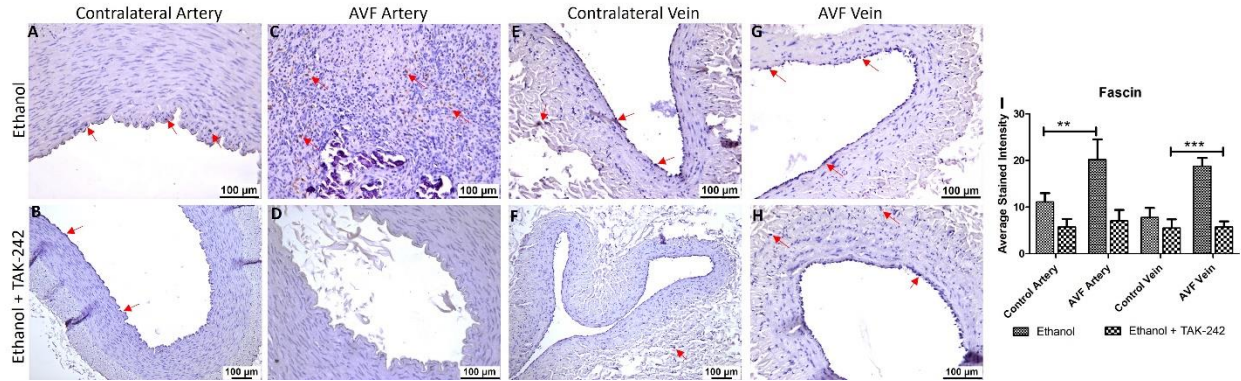

**Supplementary Figure 5:** Immunostaining for dendritic cells in femoral vessels involved in arteriovenous fistula (AVF) and contralateral femoral vessels in swine treated with toll-like receptor (TLR)-4 inhibitor TAK-242 and vehicle control (30% ethanol). Immunostaining for fascin in contralateral femoral vessels (panels A, B, E, and F) and femoral vessels involved in AVF (panels C, D, G, and H), and average stained intensity (panel I). These images are represented images from all swine selected for this study. Red arrows show the positively stained immune cells. All data are presented as Mean  $\pm$  SEM. A probability ( $p$ ) value  $<0.05$  was considered as significant. \*\* $p < 0.01$  and \*\*\* $p < 0.001$ .

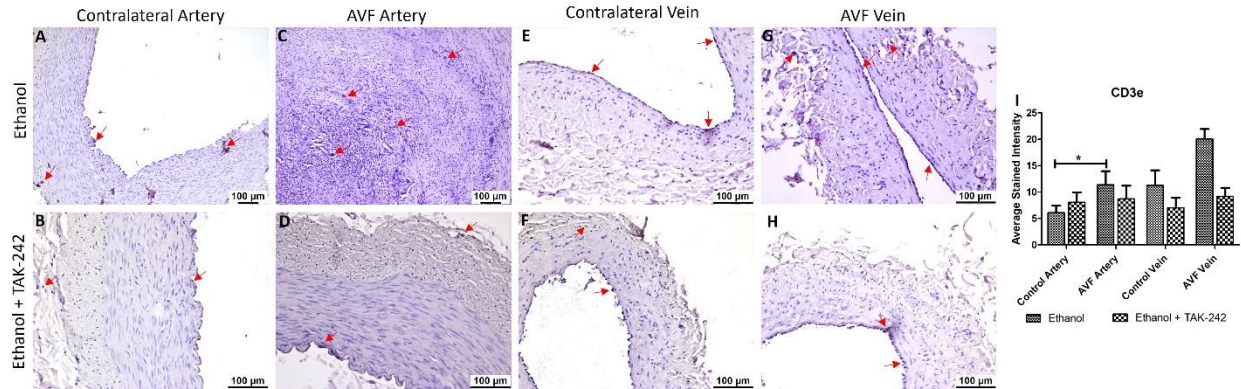

**Supplementary Figure 6:** Immunostaining for T lymphocytes in femoral vessels involved in arteriovenous fistula (AVF) and contralateral femoral vessels in swine treated with toll-like receptor (TLR)-4 inhibitor TAK-242 and vehicle control (30% ethanol). Immunostaining for CD3e in contralateral femoral vessels (panels A, B, E, and F) and femoral vessels involved in AVF (panels C, D, G, and H), and average stained intensity (panel I). These images are represented images from all swine selected for this study. Red arrows show the positively stained immune cells. All data are presented as Mean  $\pm$  SEM. A probability ( $p$ ) value  $<0.05$  was considered as significant. \* $p < 0.05$ .

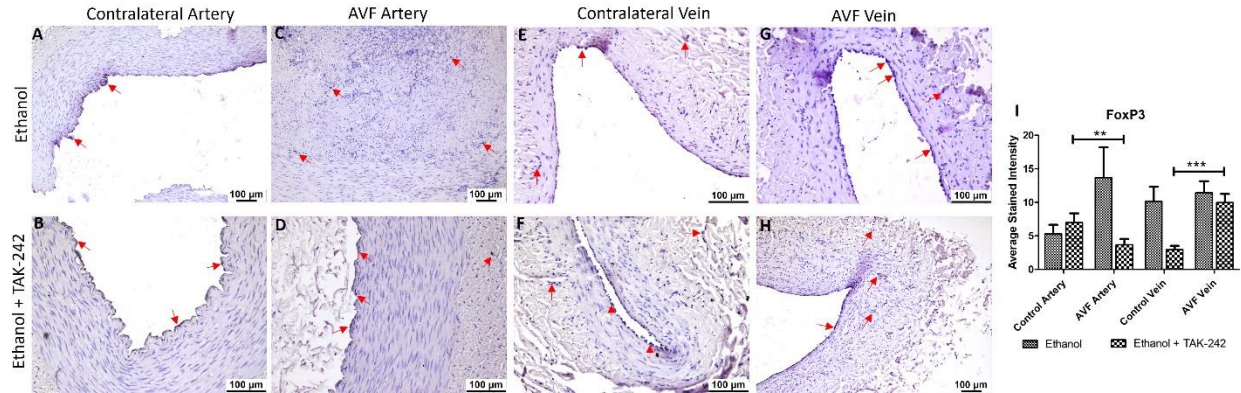

**Supplementary Figure 7:** Immunostaining for T-regulatory cells in femoral vessels involved in arteriovenous fistula (AVF) and contralateral femoral vessels in swine treated with toll-like receptor (TLR)-4 inhibitor TAK-242 and vehicle control (30% ethanol). Immunostaining for FoxP3 in contralateral femoral vessels (panels A, B, E, and F) and femoral vessels involved in AVF (panels C, D, G, and H), and average stained intensity (panel I). These images are represented images from all swine selected for this study. Red arrows show the positively stained immune cells. All data are presented as Mean  $\pm$  SEM. A probability ( $p$ ) value  $<0.05$  was considered as significant. \*\* $p<0.01$  and \*\*\* $p<0.001$ .

| ID                 | Gene.name | log2FoldChange | pvalue    |                                           |                                                                                                                                                                                                                  |
|--------------------|-----------|----------------|-----------|-------------------------------------------|------------------------------------------------------------------------------------------------------------------------------------------------------------------------------------------------------------------|
| ENSSSCG00000025578 | ALDH1A2   | 2.1946143      | 0.0264553 | Aldehyde Dehydrogenase 1 Family Member A2 | Regulates dendritic cells                                                                                                                                                                                        |
| ENSSSCG00000006452 | CD1D      | 2.30609        | 0.0003104 | cluster of differentiation 1d             | expressed on the surface of various human antigen-presenting cells. They are non-classical MHC proteins, related to the class I MHC proteins, and are involved in the presentation of lipid antigens to T cells. |
| ENSSSCG00000006309 | CD247     | 2.7839417      | 0.0006591 | cluster of differentiation 247            | encode T-cell receptor zeta                                                                                                                                                                                      |
| ENSSSCG00000017723 | CCL2      | 2.0913567      | 0.0389061 | C-C Motif Chemokine Ligand 2              | CCL2/CCR2 signaling is best known for its role in regulating macrophage recruitment and polarization during inflammation                                                                                         |
| ENSSSCG00000002821 | CCL22     | 4.877724       | 0.0087413 | C-C Motif Chemokine Ligand 22             | secreted by dendritic cells and macrophages, Anti-inflammatory role through Tregs                                                                                                                                |
| ENSSSCG00000006736 | CD2       | 3.495897       | 0.0105241 | cluster of differentiation 2              | surface antigen found on all peripheral blood T-cells                                                                                                                                                            |
| ENSSSCG00000000705 | CD27      | 3.4907096      | 0.0278599 | cluster of differentiation 27             | a member of the TNF-receptor superfamily, upon binding to CD70 regulates                                                                                                                                         |

|                    |       |           |           |                                      |                                                                                                                                                                                                                                                                                                                                          |
|--------------------|-------|-----------|-----------|--------------------------------------|------------------------------------------------------------------------------------------------------------------------------------------------------------------------------------------------------------------------------------------------------------------------------------------------------------------------------------------|
|                    |       |           |           |                                      | survival and activation of T, B, and NK lymphocytes,                                                                                                                                                                                                                                                                                     |
| ENSSSCG00000008742 | CD38  | 3.4456209 | 0.0405325 | cluster of differentiation 38        | CD38 can modulate cell recruitment, cytokines and chemokines release, cell activation, phagocytosis, and antigen presentation. CD38 expressing cells consume NAD <sup>+</sup> to produce cADPR an event that leads to inflammation, CD38 deficiency significantly alleviated angiotensin II (Ang II)-induced vascular remodeling in mice |
| ENSSSCG00000015093 | CD3D  | 4.4951389 | 0.0048688 | cluster of differentiation 3D        | CD3D is correlated with immune checkpoint and immune-infiltrated cells                                                                                                                                                                                                                                                                   |
| ENSSSCG00000013115 | CD5   | 4.0148291 | 0.0095633 | cluster of differentiation 5         | promote IL-10 secretion                                                                                                                                                                                                                                                                                                                  |
| ENSSSCG00000002866 | CEBPA | 4.0512723 | 0.0008851 | CCAAT Enhancer Binding Protein Alpha | role in controlling maturation of the myeloid lineage and is also expressed during the late phase of inflammatory responses when signs of inflammation are decreasing                                                                                                                                                                    |
| ENSSSCG00000016688 | CPVL  | 7.0612297 | 0.0409585 | Carboxypeptidase Vitellogenic Like   | involves in antigen presentation                                                                                                                                                                                                                                                                                                         |
| ENSSSCG00000016855 | FYB1  | 2.0614249 | 0.0008376 | FYN Binding Protein 1                | Acts as an adapter protein of the FYN and LCP2 signaling cascades in T-cells (By similarity). May play a role in linking T-cell signaling to remodeling of the actin cytoskeleton (PubMed:10747096, PubMed:16980616). Modulates the expression of IL2, Involved in platelet activation                                                   |
| ENSSSCG00000022490 | GPR83 | 7.1226312 | 0.0375859 | G Protein-Coupled Receptor 83        | modulate Tregs in inflammation                                                                                                                                                                                                                                                                                                           |
| ENSSSCG00000013655 | ICAM1 | 2.2900766 | 0.0347179 | Intercellular Adhesion Molecule 1    | regulates neutrophil adhesion and transcellular migration of TNF-alpha-activated vascular endothelium under flow                                                                                                                                                                                                                         |
| ENSSSCG00000009051 | IL15  | 2.0407497 | 0.0009599 | Interleukin 15                       | Cytokine that stimulates the proliferation of T-lymphocytes. Stimulation by IL15 requires interaction of IL15 with components of the IL2 receptor, including IL2RB and probably IL2RG but not                                                                                                                                            |

|                    |        |           |           |                                                  |                                                                                                                                                                                             |
|--------------------|--------|-----------|-----------|--------------------------------------------------|---------------------------------------------------------------------------------------------------------------------------------------------------------------------------------------------|
|                    |        |           |           |                                                  | IL2RA.<br>In neutrophils, stimulates phagocytosis probably by signaling through the IL15 receptor, composed of the subunits IL15RA, IL2RB and IL2RG, which results in kinase SYK activation |
| ENSSSCG00000015037 | IL18   | 2.8385591 | 1.20E-05  | Interleukin 18                                   | A proinflammatory cytokine primarily involved in polarized T-helper 1 (Th1) cell and natural killer (NK) cell immune responses                                                              |
| ENSSSCG00000011579 | PPARG  | 4.0384355 | 0.0009478 | Peroxisome proliferator-activated receptor gamma | role in inflammation                                                                                                                                                                        |
| ENSSSCG00000013839 | RASAL3 | 3.3558667 | 0.0437882 | RAS Protein Activator Like 3                     | Rasal3 controls the magnitude of inflammatory responses through the survival of both naive T cells and activated T cells                                                                    |
| ENSSSCG00000015550 | RGS16  | 3.1492297 | 0.0457468 | Regulator Of G Protein Signaling 16              | regulate T lymphocyte activation in response to inflammatory stimuli and migration induced by CXCR4                                                                                         |
| ENSSSCG00000030680 | TCF7   | 2.736719  | 0.0355257 | Transcription Factor 7                           | promote T cells differentiating to Th2 or memory T cells                                                                                                                                    |
| ENSSSCG00000022512 | TRDC   | 4.2549358 | 0.0079438 | T Cell Receptor Delta Constant                   | one component of the $\gamma\delta$ T cell receptor which is essential for development of $\gamma\delta$ T cells                                                                            |
| ENSSSCG00000029813 | TSPAN5 | 2.0982716 | 0.0259364 | Tetraspanin 5                                    | Endothelial Tspan5- and Tspan17-ADAM10 complexes may regulate inflammation by maintaining normal VE-cadherin expression and promoting T lymphocyte transmigration.                          |

Supplementary Table 1
